# Supplementary material for: Implementing Disease Modifying Therapies in Neurodegenerative Diseases: Lessons From a Survey of Multiple Sclerosis Specialist Services Across England
Source: Research Square preprint supplement (doi:10.21203/rs.3.rs-7924929/v1), 2025-12-09
Supplement: Supplementary file 1 [file 1f050cb73785ce7dce4f240f.docx]

| **Table 1- Characteristics of Services** | | | | |
| --- | --- | --- | --- | --- |
|  | **Service A** | **Service B** | **Service C** | **Service D** |
| **MS caseload**  Caseload, n  Patients on DMT, n(%)  Patients not on DMT, n(%)  New patients in the past year, N  Patients reviewed in the past year(%)  Main method of review  Change in referrals compared to previous year  Patients who initiated DMT in the past year, n  Patients under joint follow-up with another team, %  New patients referred from out of area, %  Current patients travelling from out of area, %  Patients transitioned from paediatric services, n  Patients discharged in the past year, n  Main reason for patient discharge  Use of PIFU  Requirement for confirmed/high likely diagnosis | 2800  947 (33.8%)  1853 (66.2%)  -  80-100%  By phone  No change  92  0-20%  0-20%  0-20%  -  -  Moving house  Yes  No | 2100  800 (38%)  1300 (62%)  78  41-60%  In-person & by phone  Increased  25-30  0-20%  0-20%  0-20%  2  10-15  Moving house  Yes  No | 950  385 (40%)  565 (60%)  120  41-60%  In-person & by phone  Increased  -  0-20%  0-20%  0-20%  0  3  Moving house  Yes  Yes | 305  192 (63%)  113 (37%)  176  61-80%  In-person  Increased  -  61-80%  21-40%  21-40%  1  2  Moving house  Yes  Yes |
| **Core staff composition, FTE (N)**  General Neurologist  MS Specialist Neurologist  MS Nurse (hospital)  MS Nurse (community)  Pharmacist  (Neuro)Physiotherapist  Occupational Therapist  SAS doctors/ LED doctors  Research nurses  Clinical/ visiting fellows  Research fellows  Trainees  Administrator/ Co-ordinator  Staff funded by non-NHS | 9 (10)  1 (1)  3.7 (5)  0  0.7 (1)  -  -  0  1.6 (2)  0  0  6.5 (7)  1.6 (2)  None | 0  1.2 (3)  3 (4)  0  0  1.5 (2)  0.25 (1)  0  1 (1)  0  0  0.2 (1)  0  None | 0  1.6 (2)  2 (2)  0  0  0.5 (1)  0  0  0.2 (1)  0  0  0.2 (1)  0.8 (1)  MS nurse (charity-funded) | 2 (3)  0.3 (2)  0.6 (1)  1 (1)  0.5 (1)  0  0  1 (1)  0  0  0  0  0  None |
| **Total FTE** | 24.1 | 5.2 | 5.3 | 5.4 |
| **Available DMTs**  Alemtuzumab (Lemtrada)  Avonex (interferon beta-1a)  Cladribine (Mavenclad)  Dimethyl fumarate (Tecfidera)  Diroximel fumarate (Vumerity)  Fingolimod (Gilenya)  Glatiramer acetate (Copaxone)  HSCT  Natalizumab (Tysabri)  Ocrelizumab (Ocrevus)  Ofatumumab (Kesimpta)  Ozanimod (Zeposia)  Plegridy (peginterferon beta 1a)  Ponesimod (Ponvory)  Rebif (beta interferon-1a)  Siponimod (Mayzent)  Teriflunomide (Aubagio) | N  Y  Y  Y  Y  Y  Y  N  Y  Y  Y  N  Y  Y  Y  Y  Y | Y  Y  Y  Y  Y  Y  Y  Y  Y  Y  Y  Y  Y  Y  Y  Y  Y | Y  Y  Y  Y  Y  Y  Y  N  Y  Y  Y  N  Y  Y  Y  Y  Y | Y  Y  Y  Y  Y  Y  Y  Y  Y  Y  Y  Y  Y  Y  Y  Y  Y |
| **No. of offered DMTs (out of 17)** | 14 | 17 | 15 | 17 |
