# Supplementary material for: Implementing Disease Modifying Therapies in Neurodegenerative Diseases: Lessons From a Survey of Multiple Sclerosis Specialist Services Across England
Source: Research Square preprint supplement (doi:10.21203/rs.3.rs-7924929/v1), 2025-12-09
Supplement: Supplementary file 2 [file 967d88abefca8a4479b68a32.docx]

**Supplementary material**

**Table S1: Characteristics of participants by service**

|  | **Service A** | **Service B** | **Service C** | **Service D** | **Service E (not included as a case)** |
| --- | --- | --- | --- | --- | --- |
| **Number of participants** | 2 | 4 | 3 | 2 | 1 |
| **Roles of participants (years in role)** | Consultant in neurological rehabilitation medicine (21), Consultant Neurologist (5) | Consultant Neurologist (14), ESP Physiotherapist in MS (10), MS Nurse (10, 6) | Consultant Neurologist (10, 5), MS nurse (5 months) | Consultant Neurologist (12), Clinical researcher (8) | Neuroinflammation clinic coordinator (21 months) |

ESP=

**Table S2: Coding framework for responses to question regarding Future proofing DMT services, with examples of items coded in each category**

| **Code** | **N** | **Example of items coded** |
| --- | --- | --- |
| Increasing resources | 10 | *“increasing staff numbers, clinic availability in terms of time and space”*  *“Expand role MSSN [] and have MS co-ordinator”*  *“more money, staff and MDT coordinators”*  *“we need successful business case for MS coordinator”* |
| Innovation | 1 | *“Use of innovative AI models to help with the admin burden of the work e.g DMT blood monitoring, chasing patients for infusions”* |
| Change in the service model | 1 | *“Neurology need to have a realistic decision about long-term neurological disorders management, and be willing to discharge more patients to neurorehab services and not insist on dual follow-up, so that they have capacity to see patients in a timely manner!”* |

**Table S3: Coding framework for responses to question regarding major challenges in the service, with examples of items coded in each category**

| **Code** | **N** | **Example of items coded** |
| --- | --- | --- |
| Challenges to quality of care: insufficient resources for growing needs | 12 | *“time to respond to calls and emails from patients”*  *“**not having enough MS specialists neurologists with the increasing number of patients.”*  *“coordination of so many DMTs now, staffing with an increased number of patients that are living longer and more active.”* |
| Accessibility/ equity (challenges) | 2 | *“We have very limited access to the community, a MS nurse in the community trust would be beneficial”*  *“holistic care of non-DMT patients so they don't have capacity to deal with complex and advanced MS patients”*  *“Lack of resources and delivery of DMT closer to home which set up inequity”* |
| Innovation (challenges) |  | *“Workforce pressures, staff overworked, little scope for innovation due to lack of funding”* |

**Table S4: Coding framework for responses to question regarding what the respondent is proud of in the service, with examples of items coded in each category**

| **Code** | **N** | **Example of items coded** |
| --- | --- | --- |
| Quality of care provided | 7 | *“nurses and team as they do very hard work and resolve all troubles, very low number of complaints and very supportive.”*  *“excellent team and how cohesive.”*  *“the quality of reviews and interventions, making every contact count.”*  *“The expert service provided despite all the challenges within the NHS”*  *“we try to manage risk, we work as a team and mostly meet NICE guidelines”* |
| Innovation | 2 | *“the innovative ways of working that have been implemented recently to improve patient experience”*  *“innovative service and meet needs of most of their patients”* |
| Accessibility | 4 | *“lots of access to most new meds for patients and research active.”*  *“provision of DMTs in DGH settings”*  *“maintaining access targets and being able to see patients in community”*  *“The quickness people are seen if they are having a relapse.”* |
